# Supplementary material
Source: publisher figshare collection journal article supplement (https://tandf.figshare.com/ndownloader/files/31463965)
Supplement: Supplementary file 1 [file 31463965]

Supplementary Table 1 Characteristics in recurrent patients

|                                          | CHT<br>(n=18) | IM<br>(n=25) | p <sup>a</sup> |
|------------------------------------------|---------------|--------------|----------------|
| Median (IQR) time to recurrence (months) | 7 (3)         | 7 (8)        | 0.754          |
| Patient characteristics                  |               |              |                |
| Sex                                      |               |              |                |
| Male, recurrence/total (%)               | 2/13 (15.4%)  | 9/19 (47.4%) | 0.130          |
| Female, recurrence/total (%)             | 0/5 (0%)      | 3/6 (50%)    | 0.114          |
| Initial pathological stage               |               |              |                |
| pTa, recurrence/total (%)                | 2/10 (20%)    | 8/18 (44.4%) | 0.300          |
| pT1, recurrence/total (%)                | 0/8 (0%)      | 4/7 (57.1%)  | 0.033          |

CHT: chemohyperthermia

IM: intravesical mitomycin

IQR: interquartile range

<sup>a</sup> Tested by Independent T test.
